# Supplementary material for: In patients who had a stroke or TIA, enlarged perivascular spaces in basal ganglia may cause future haemorrhagic strokes
Source: PubMed Central journal article supplement — Stroke Vasc Neurol. 2023 May 15;9(1):8–17. doi: 10.1136/svn-2022-002157 (PMC10956113; doi:10.1136/svn-2022-002157), 2023-05-15

**Table S1. Baseline characteristics of included and excluded patients with AIS/TIA from the CNSR-III study**

| Characteristics                                             | ALL(n=15166)       | Excluded(n=2563)   | INCLUDED(n=12603)  | P value |
|-------------------------------------------------------------|--------------------|--------------------|--------------------|---------|
| Age, years, mean(SD)                                        | 32.2±11.3          | 61.7±11.6          | 62.3±11.2          | 0.01    |
| BMI, kg/m <sup>2</sup> , mean(SD)                           | 24.7±3.3           | 24.6±3.2           | 24.7±3.4           | 0.22    |
| Sex, male(%)                                                | 10365(68.3)        | 1765(68.9)         | 8599(68.2)         | 0.53    |
| Alcohol intake, n(%)                                        | 2126(14.0)         | 351(13.7)          | 1775(14.1)         | 0.61    |
| Tobacco intake, n(%)                                        | 4752(31.3)         | 820(32.0)          | 3932(31.2)         | 0.43    |
| SBP, mm Hg, median(IQR)                                     | 148.0(135.0-163.5) | 147.5(135.0-162.5) | 148.5(135.0-163.5) | 0.12    |
| DBP, mm Hg, median(IQR)                                     | 86.0(79.0-95.0)    | 85.0(79.0-95.0)    | 86.5(79.0-95.5)    | 0.043   |
| History of disease, n(%)                                    |                    |                    |                    |         |
| Diabetes mellitus                                           | 3510(23.1)         | 644(25.1)          | 2866(22.7)         | 0.009   |
| Hypertension                                                | 9494(62.6)         | 1581(61.7)         | 7913(62.8)         | 0.29    |
| Hyperlipidemia                                              | 1191(7.9)          | 187(7.3)           | 1004(8.0)          | 0.25    |
| Stroke                                                      | 3355(22.1)         | 591(23.1)          | 2764(21.9)         | 0.21    |
| TIA                                                         | 416(2.7)           | 76(3.0)            | 340(2.7)           | 0.45    |
| Coronary artery disease                                     | 1608(10.6)         | 331(12.9)          | 1277(10.1)         | <0.001  |
| Heart failure                                               | 94(0.6)            | 19(0.7)            | 75(0.6)            | 0.39    |
| Peripheral artery disease                                   | 118(0.8)           | 24(0.9)            | 94(0.8)            | 0.32    |
| Medication use during hospitalization or at discharge, n(%) |                    |                    |                    |         |
| Anti-platelet treatment                                     | 14822(97.7)        | 2475(96.6)         | 12347(98.0)        | <0.001  |
| Anticoagulation treatment                                   | 1621(10.7)         | 345(13.5)          | 1276(10.1)         | <0.001  |
| Stains treatment                                            | 14731(97.1)        | 2448(95.5)         | 12283(97.5)        | <0.001  |
| Hypoglycemic treatment                                      | 4046(26.7)         | 720(28.1)          | 3326(26.4)         | 0.08    |
| Antihypertension treatment                                  | 8136(53.7)         | 1355(52.9)         | 6781(53.8)         | 0.39    |

|                                 |              |              |              |        |
|---------------------------------|--------------|--------------|--------------|--------|
| NIHSS on admission, median(IQR) | 3.0(1.0-6.0) | 3.0(1.0-6.0) | 3.0(1.0-6.0) | 0.20   |
| mRS, median(IQR)                | 0.0(0.0-1.0) | 0.0(0.0-1.0) | 0.0(0.0-1.0) | <0.001 |
| Index event, n(%)               |              |              |              | 0.02   |
| Ischemic stroke                 | 14146(93.3)  | 2363(92.2)   | 11783(93.5)  |        |
| TIA                             | 1020(6.7)    | 200(7.8)     | 820(6.5)     |        |
| TOAST, n(%)                     |              |              |              | <0.001 |
| Large artery atherosclerosis    | 3856(25.4)   | 526(20.5)    | 3330(26.4)   |        |
| Cardioembolism                  | 917(6.1)     | 188(7.3)     | 729(5.8)     |        |
| Small vascular occlusion        | 3165(20.9)   | 300(11.7)    | 2865(22.7)   |        |
| Other determination             | 182(1.2)     | 11(0.4)      | 171(1.4)     |        |
| Undetermined                    | 7046(46.5)   | 1538(60.0)   | 5508(43.7)   |        |

SD, standard deviation; IQR, interquartile range; AIS, acute ischemic attack; TIA, transient ischemic attack; EPVS, enlarged perivascular spaces; BG-EPVS, EPVS in basal ganglia; CSO-EPVS, EPVS in centrum semiovale; BMI, body mass index; SBP, systolic blood pressure; DBP, diastolic blood pressure; CAD: coronary artery disease; NIHSS, National Institutes of Health Stroke Scale score; mRS, modified Rankin scale; TOAST, Trial of Org 10,172 in Acute Stroke Treatment; CSVD, cerebral small vessel disease; WMH, white matter hyperintensity; D-WMH, deep-WMH; PV-WMH, periventricular-WMH.

**Table S2. Baseline characteristics of patients with AIS/TIA according to CSO-EPVS**

| Characteristics                                             | CSO-EPVS              |                      |                              |         |
|-------------------------------------------------------------|-----------------------|----------------------|------------------------------|---------|
|                                                             | None/Mild<br>(n=6539) | Moderate<br>(n=4352) | Frequency/Severe<br>(n=1712) | P value |
| Age, years, mean(SD)                                        | 61.9±11.7             | 62.6±10.8            | 63.3±10.4                    | <0.001  |
| BMI, kg/m <sup>2</sup> , mean(SD)                           | 24.7±3.4              | 24.8±3.4             | 24.7±3.1                     | 0.18    |
| Sex, male(%)                                                | 4354(66.6)            | 3011(69.2)           | 1234(72.1)                   | <0.001  |
| Alcohol intake, n(%)                                        | 883(13.5)             | 642(14.8)            | 250(14.6)                    | 0.15    |
| Tobacco intake, n(%)                                        | 2061(31.5)            | 1365(31.4)           | 506(29.6)                    | 0.28    |
| SBP, mm Hg, median(IQR)                                     | 147.5(134.5-163.0)    | 149.0(135.0-164.0)   | 150.0(137.0-165.0)           | <0.001  |
| DBP, mm Hg, median(IQR)                                     | 86.0(79.0-95.0)       | 87.0(79.5-96.0)      | 87.5(80.0-96.5)              | <0.001  |
| History of disease, n(%)                                    |                       |                      |                              |         |
| Diabetes mellitus                                           | 1479(22.6)            | 983(22.6)            | 404(23.6)                    | 0.66    |
| Hypertension                                                | 3908(59.8)            | 2799(64.3)           | 1206(70.4)                   | <0.001  |
| Hyperlipidemia                                              | 482(7.4)              | 375(8.6)             | 147(8.6)                     | 0.04    |
| Stroke                                                      | 1366(20.9)            | 982(22.6)            | 416(24.3)                    | 0.005   |
| TIA                                                         | 157(2.4)              | 126(2.9)             | 57(3.3)                      | 0.07    |
| Coronary artery disease                                     | 648(9.9)              | 454(10.4)            | 175(10.2)                    | 0.67    |
| Heart failure                                               | 47(0.7)               | 20(0.5)              | 8(0.5)                       | 0.17    |
| Peripheral artery disease                                   | 43(0.7)               | 39(0.9)              | 12(0.7)                      | 0.36    |
| Medication use during hospitalization or at discharge, n(%) |                       |                      |                              |         |
| Anti-platelet treatment                                     | 6388(97.7)            | 4277(98.3)           | 1682(98.3)                   | 0.07    |
| Anticoagulation treatment                                   | 660(10.1)             | 445(10.2)            | 171(10.0)                    | 0.96    |
| Stains treatment                                            | 6359(97.3)            | 4248(97.6)           | 1676(97.9)                   | 0.23    |
| Hypoglycemic treatment                                      | 1708(26.1)            | 1140(26.2)           | 478(27.9)                    | 0.30    |

|                                 |              |              |              |        |
|---------------------------------|--------------|--------------|--------------|--------|
| Antihypertension treatment      | 3311(50.6)   | 2411(55.4)   | 1059(61.9)   | <0.001 |
| NIHSS on admission, median(IQR) | 3.0(1.0-6.0) | 3.0(1.0-6.0) | 3.0(1.0-5.0) | 0.02   |
| mRS, median(IQR)                | 0.0(0.0-0.0) | 0.0(0.0-1.0) | 0.0(0.0-1.0) | 0.005  |
| Index event, n(%)               |              |              |              |        |
| Ischemic stroke                 | 6120(93.6)   | 4065(93.4)   | 1598(93.3)   | 0.89   |
| TIA                             | 419(6.4)     | 287(6.6)     | 114(6.7)     |        |
| TOAST, n(%)                     |              |              |              | 0.002  |
| Large artery atherosclerosis    | 1646(25.2)   | 1189(27.3)   | 495(28.9)    |        |
| Cardioembolism                  | 398(6.1)     | 240(5.5)     | 91(5.3)      |        |
| Small vascular occlusion        | 1454(22.2)   | 988(22.7)    | 423(24.7)    |        |
| Other determination             | 92(1.4)      | 57(1.3)      | 22(1.3)      |        |
| Undetermined                    | 2949(45.1)   | 1878(43.2)   | 681(39.8)    |        |
| CSVD markers                    |              |              |              |        |
| D-WMH, median(IQR)              | 1.0(1.0-2.0) | 1.0(1.0-2.0) | 1.0(1.0-2.0) | <0.001 |
| PV-WMH, median(IQR)             | 1.0(1.0-2.0) | 1.0(1.0-2.0) | 2.0(1.0-2.0) | 0.03   |
| Lacune, n(%)                    | 2971(45.4)   | 2268(52.1)   | 987(57.7)    | <0.001 |

SD, standard deviation; IQR, interquartile range; AIS, acute ischemic attack; TIA, transient ischemic attack; EPVS, enlarged perivascular spaces; CSO-EPVS, EPVS in centrum semiovale; BMI, body mass index; SBP, systolic blood pressure; DBP, diastolic blood pressure; CAD: coronary artery disease; NIHSS, National Institutes of Health Stroke Scale score; mRS, modified Rankin scale; TOAST, Trial of Org 10,172 in Acute Stroke Treatment; CSVD, cerebral small vessel disease; WMH, white matter hyperintensity; D-WMH, deep-WMH; PV-WMH, periventricular-WMH.

**Table S3. The associations between BG-EPVS and clinical outcomes in patients with AIS/TIA**

| Outcomes                             | Events, n(%) | Model 1         |         | Model 2         |         | Model 3         |         | Model 4         |         |
|--------------------------------------|--------------|-----------------|---------|-----------------|---------|-----------------|---------|-----------------|---------|
|                                      |              | HR/OR(95% CI)   | P value |
| <b>Stroke at 3 months</b>            |              |                 |         |                 |         |                 |         |                 |         |
| None/Mild                            | 523(6.1)     | Ref.(1.00)      |         | Ref.(1.00)      |         | Ref.(1.00)      |         | Ref.(1.00)      |         |
| Moderate                             | 192(6.1)     | 1.01(0.86-1.19) | 0.90    | 0.95(0.81-1.13) | 0.59    | 0.90(0.76-1.08) | 0.26    | 0.95(0.80-1.13) | 0.56    |
| Frequent/Severe                      | 46(5.5)      | 0.91(0.67-1.23) | 0.54    | 0.82(0.60-1.11) | 0.19    | 0.76(0.55-1.04) | 0.09    | 0.85(0.62-1.15) | 0.29    |
| <b>Ischaemic Stroke at 3 months</b>  |              |                 |         |                 |         |                 |         |                 |         |
| None/Mild                            | 496(5.7)     | Ref.(1.00)      |         | Ref.(1.00)      |         | Ref.(1.00)      |         | Ref.(1.00)      |         |
| Moderate                             | 179(5.7)     | 0.99(0.84-1.18) | 0.94    | 0.93(0.78-1.11) | 0.45    | 0.89(0.74-1.06) | 0.20    | 0.93(0.78-1.11) | 0.42    |
| Frequent/Severe                      | 40(4.8)      | 0.83(0.60-1.15) | 0.27    | 0.74(0.53-1.03) | 0.07    | 0.70(0.50-0.98) | 0.04    | 0.77(0.55-1.07) | 0.12    |
| <b>Hemorrhage stroke at 3 months</b> |              |                 |         |                 |         |                 |         |                 |         |
| None/Mild                            | 34(0.4)      | Ref.(1.00)      |         | Ref.(1.00)      |         | Ref.(1.00)      |         | Ref.(1.00)      |         |
| Moderate                             | 15(0.5)      | 1.22(0.66-2.24) | 0.53    | 1.20(0.64-2.25) | 0.57    | 1.13(0.59-2.17) | 0.71    | 1.28(0.68-2.41) | 0.45    |
| Frequent/Severe                      | 6(0.7)       | 1.83(0.77-4.37) | 0.17    | 1.83(0.74-4.53) | 0.19    | 1.48(0.58-3.78) | 0.41    | 1.92(0.78-4.77) | 0.16    |
| <b>CVE at 3 months</b>               |              |                 |         |                 |         |                 |         |                 |         |
| None/Mild                            | 534(6.2)     | Ref.(1.00)      |         | Ref.(1.00)      |         | Ref.(1.00)      |         | Ref.(1.00)      |         |
| Moderate                             | 203(6.5)     | 1.05(0.89-1.23) | 0.57    | 0.98(0.83-1.16) | 0.81    | 0.94(0.79-1.12) | 0.47    | 0.98(0.83-1.16) | 0.81    |

|                                         |           |                 |      |                 |      |                 |      |                 |      |
|-----------------------------------------|-----------|-----------------|------|-----------------|------|-----------------|------|-----------------|------|
| Frequent/Severe                         | 49(5.9)   | 0.95(0.71-1.27) | 0.72 | 0.84(0.62-1.13) | 0.25 | 0.80(0.58-1.08) | 0.14 | 0.87(0.65-1.18) | 0.37 |
| <b>Disability(mRS 3-5) at 3 months*</b> |           |                 |      |                 |      |                 |      |                 |      |
| None/Mild                               | 993(11.8) | Ref.(1.00)      |      | Ref.(1.00)      |      | Ref.(1.00)      |      | Ref.(1.00)      |      |
| Moderate                                | 405(13.3) | 1.15(1.02-1.30) | 0.03 | 0.96(0.85-1.09) | 0.55 | 0.99(0.86-1.14) | 0.88 | 1.05(0.91-1.22) | 0.48 |
| Frequent/Severe                         | 117(14.6) | 1.28(1.04-1.58) | 0.02 | 0.93(0.75-1.15) | 0.51 | 0.99(0.78-1.26) | 0.93 | 1.12(0.88-1.42) | 0.35 |
| <b>All-cause death at 3 months</b>      |           |                 |      |                 |      |                 |      |                 |      |
| None/Mild                               | 93(1.1)   | Ref.(1.00)      |      | Ref.(1.00)      |      | Ref.(1.00)      |      | Ref.(1.00)      |      |
| Moderate                                | 44(1.4)   | 1.31(0.91-1.87) | 0.14 | 0.91(0.63-1.32) | 0.63 | 0.95(0.65-1.38) | 0.77 | 1.01(0.70-1.46) | 0.96 |
| Frequent/Severe                         | 16(1.9)   | 1.79(1.06-3.05) | 0.03 | 0.93(0.54-1.60) | 0.80 | 0.98(0.56-1.73) | 0.95 | 1.11(0.64-1.93) | 0.72 |
| <b>Stroke at 1 year</b>                 |           |                 |      |                 |      |                 |      |                 |      |
| None/Mild                               | 802(9.3)  | Ref.(1.00)      |      | Ref.(1.00)      |      | Ref.(1.00)      |      | Ref.(1.00)      |      |
| Moderate                                | 301(9.6)  | 1.04(0.91-1.19) | 0.58 | 0.97(0.85-1.12) | 0.70 | 0.86(0.75-0.99) | 0.04 | 0.96(0.84-1.10) | 0.57 |
| Frequent/Severe                         | 86(10.3)  | 1.12(0.89-1.39) | 0.34 | 0.99(0.79-1.25) | 0.94 | 0.82(0.65-1.04) | 0.10 | 1.01(0.80-1.27) | 0.93 |
| <b>Ischaemic Stroke at 1 year</b>       |           |                 |      |                 |      |                 |      |                 |      |
| None/Mild                               | 752(8.7)  | Ref.(1.00)      |      | Ref.(1.00)      |      | Ref.(1.00)      |      | Ref.(1.00)      |      |
| Moderate                                | 276(8.8)  | 1.02(0.88-1.17) | 0.83 | 0.94(0.82-1.09) | 0.42 | 0.85(0.73-0.98) | 0.03 | 0.94(0.81-1.08) | 0.36 |
| Frequent/Severe                         | 69(8.3)   | 0.95(0.75-1.22) | 0.71 | 0.83(0.65-1.07) | 0.16 | 0.71(0.55-0.92) | 0.01 | 0.86(0.67-1.11) | 0.24 |

| <b>Hemorrhage stroke at 1 year</b>     |           |                 |        |                 |        |                 |      |                 |        |
|----------------------------------------|-----------|-----------------|--------|-----------------|--------|-----------------|------|-----------------|--------|
| None/Mild                              | 60(0.7)   | Ref.(1.00)      |        | Ref.(1.00)      |        | Ref.(1.00)      |      | Ref.(1.00)      |        |
| Moderate                               | 29(0.9)   | 1.34(0.86-2.09) | 0.20   | 1.40(0.88-2.21) | 0.15   | 1.03(0.65-1.65) | 0.89 | 1.33(0.84-2.11) | 0.23   |
| Frequent/Severe                        | 17(2.0)   | 2.98(1.74-5.10) | <0.001 | 3.25(1.84-5.77) | <0.001 | 1.99(1.11-3.58) | 0.02 | 3.06(1.73-5.42) | <0.001 |
| <b>CVE at 1 year</b>                   |           |                 |        |                 |        |                 |      |                 |        |
| None/Mild                              | 836(9.7)  | Ref.(1.00)      |        | Ref.(1.00)      |        | Ref.(1.00)      |      | Ref.(1.00)      |        |
| Moderate                               | 322(10.3) | 1.07(0.94-1.21) | 0.33   | 0.99(0.87-1.13) | 0.92   | 0.88(0.77-1.01) | 0.08 | 0.98(0.86-1.12) | 0.79   |
| Frequent/Severe                        | 95(11.4)  | 1.18(0.96-1.46) | 0.12   | 1.04(0.84-1.30) | 0.72   | 0.87(0.70-1.09) | 0.23 | 1.06(0.85-1.32) | 0.59   |
| <b>Disability(mRS 3-5) at 1 year**</b> |           |                 |        |                 |        |                 |      |                 |        |
| None/Mild                              | 783(9.5)  | Ref.(1.00)      |        | Ref.(1.00)      |        | Ref.(1.00)      |      | Ref.(1.00)      |        |
| Moderate                               | 335(11.4) | 1.22(1.07-1.40) | 0.004  | 0.94(0.82-1.08) | 0.40   | 0.91(0.78-1.06) | 0.22 | 1.00(0.86-1.17) | 0.96   |
| Frequent/Severe                        | 100(13.2) | 1.45(1.16-1.81) | 0.001  | 0.91(0.72-1.15) | 0.43   | 0.88(0.68-1.14) | 0.34 | 1.08(0.84-1.39) | 0.53   |
| <b>All-cause death at 1 year</b>       |           |                 |        |                 |        |                 |      |                 |        |
| None/Mild                              | 226(2.6)  | Ref.(1.00)      |        | Ref.(1.00)      |        | Ref.(1.00)      |      | Ref.(1.00)      |        |
| Moderate                               | 109(3.5)  | 1.34(1.06-1.68) | 0.01   | 0.94(0.75-1.19) | 0.61   | 0.87(0.69-1.11) | 0.27 | 0.99(0.78-1.26) | 0.95   |
| Frequent/Severe                        | 47(5.6)   | 2.19(1.60-3.00) | <0.001 | 1.18(0.85-1.63) | 0.32   | 1.06(0.76-1.48) | 0.74 | 1.31(0.94-1.82) | 0.11   |

Model 1: unadjusted;

Model 2: adjusted for age and sex;

Model 3: adjusted for age, sex, BMI, SBP, DBP, mRS, NIHSS, alcohol intake, tobacco intake, diabetes, hypertension, hyperlipidemia, stroke, CAD, index event, TOAST, lacunes, PV-WMH, and D-WMH.

Model 4: adjusted for age, sex, BMI, SBP, DBP, mRS, NIHSS, alcohol intake, tobacco intake, diabetes, hypertension, hyperlipidemia, stroke, CAD, index event, TOAST.

\*A total of 12304 patients with AIS/TIA were included in the analyses of the association between EPVS and disability because of 299 patients without available mRS score at 3-month follow-up.

\*\*A total of 11932 patients with AIS/TIA were included in the analyses of the association between EPVS and disability because of 671 patients without available mRS score at 1-year follow-up.

HR, hazard ratio; OR, odds ratio; CI, confidence interval, Ref, reference; CVE, combined vascular event; AIS, acute ischemic attack; TIA, transient ischemic attack; EPVS, enlarged perivascular spaces; BG-EPVS, EPVS in basal ganglia; CSO-EPVS, EPVS in centrum semiovale; BMI, body mass index; SBP, systolic blood pressure; DBP, diastolic blood pressure; CAD: coronary artery disease; NIHSS, National Institutes of Health Stroke Scale score; mRS, modified Rankin scale; TOAST, Trial of Org 10,172 in Acute Stroke Treatment; WMH, white matter hyperintensity; D-WMH, deep-WMH; PV-WMH, periventricular-WMH.



**Table S4. The associations between CSO-EPVS and clinical outcomes in patients with AIS/TIA**

| Outcomes                             | Events, n(%) | Model 1         |         | Model 2         |         | Model 3         |         | Model 4         |         |
|--------------------------------------|--------------|-----------------|---------|-----------------|---------|-----------------|---------|-----------------|---------|
|                                      |              | HR/OR(95% CI)   | P value |
| <b>Stroke at 3 months</b>            |              |                 |         |                 |         |                 |         |                 |         |
| None/Mild                            | 381(5.8)     | Ref.(1.00)      |         | Ref.(1.00)      |         | Ref.(1.00)      |         | Ref.(1.00)      |         |
| Moderate                             | 281(6.5)     | 1.11(0.95-1.30) | 0.19    | 1.11(0.95-1.29) | 0.19    | 1.11(0.95-1.30) | 0.19    | 1.10(0.94-1.29) | 0.22    |
| Frequent/Severe                      | 99(5.8)      | 0.99(0.79-1.24) | 0.93    | 0.99(0.79-1.23) | 0.90    | 0.98(0.79-1.23) | 0.87    | 0.98(0.78-1.22) | 0.84    |
| <b>Ischaemic Stroke at 3 months</b>  |              |                 |         |                 |         |                 |         |                 |         |
| None/Mild                            | 715(5.7)     | Ref.(1.00)      |         | Ref.(1.00)      |         | Ref.(1.00)      |         | Ref.(1.00)      |         |
| Moderate                             | 265(6.1)     | 1.11(0.95-1.31) | 0.18    | 1.11(0.95-1.31) | 0.19    | 1.11(0.95-1.30) | 0.19    | 1.10(0.94-1.30) | 0.22    |
| Frequent/Severe                      | 92(5.4)      | 0.98(0.78-1.23) | 0.86    | 0.98(0.78-1.23) | 0.84    | 0.97(0.77-1.22) | 0.80    | 0.97(0.77-1.22) | 0.77    |
| <b>Hemorrhage stroke at 3 months</b> |              |                 |         |                 |         |                 |         |                 |         |
| None/Mild                            | 28(0.4)      | Ref.(1.00)      |         | Ref.(1.00)      |         | Ref.(1.00)      |         | Ref.(1.00)      |         |
| Moderate                             | 17(0.4)      | 0.91(0.50-1.66) | 0.76    | 0.90(0.49-1.64) | 0.73    | 0.87(0.48-1.60) | 0.66    | 0.87(0.48-1.60) | 0.66    |
| Frequent/Severe                      | 10(0.6)      | 1.36(0.66-2.81) | 0.40    | 1.32(0.64-2.73) | 0.45    | 1.36(0.66-2.83) | 0.41    | 1.38(0.66-2.85) | 0.39    |
| <b>CVE at 3 months</b>               |              |                 |         |                 |         |                 |         |                 |         |
| None/Mild                            | 392(6.0)     | Ref.(1.00)      |         | Ref.(1.00)      |         | Ref.(1.00)      |         | Ref.(1.00)      |         |
| Moderate                             | 289(6.6)     | 1.11(0.95-1.29) | 0.18    | 1.11(0.95-1.29) | 0.19    | 1.11(0.95-1.29) | 0.18    | 1.10(0.95-1.28) | 0.21    |

|                                         |           |                 |       |                 |        |                 |       |                 |        |
|-----------------------------------------|-----------|-----------------|-------|-----------------|--------|-----------------|-------|-----------------|--------|
| Frequent/Severe                         | 105(6.1)  | 1.02(0.82-1.27) | 0.85  | 1.01(0.82-1.26) | 0.90   | 1.01(0.82-1.26) | 0.90  | 1.01(0.81-1.25) | 0.94   |
| <b>Disability(mRS 3-5) at 3 months*</b> |           |                 |       |                 |        |                 |       |                 |        |
| None/Mild                               | 856(13.4) | Ref.(1.00)      |       | Ref.(1.00)      |        | Ref.(1.00)      |       | Ref.(1.00)      |        |
| Moderate                                | 484(11.4) | 0.83(0.74-0.93) | 0.002 | 0.82(0.73-0.92) | 0.001  | 0.82(0.72-0.94) | 0.004 | 0.82(0.72-0.94) | <0.001 |
| Frequent/Severe                         | 175(10.4) | 0.75(0.63-0.89) | 0.001 | 0.73(0.61-0.87) | <0.001 | 0.76(0.62-0.92) | 0.004 | 0.76(0.63-0.92) | 0.004  |
| <b>All-cause death at 3 months</b>      |           |                 |       |                 |        |                 |       |                 |        |
| None/Mild                               | 98(1.5)   | Ref.(1.00)      |       | Ref.(1.00)      |        | Ref.(1.00)      |       | Ref.(1.00)      |        |
| Moderate                                | 42(1.0)   | 0.64(0.45-0.92) | 0.02  | 0.65(0.45-0.93) | 0.02   | 0.67(0.47-0.97) | 0.03  | 0.69(0.48-0.99) | 0.04   |
| Frequent/Severe                         | 13(0.8)   | 0.51(0.28-0.90) | 0.02  | 0.50(0.28-0.89) | 0.02   | 0.55(0.31-0.98) | 0.04  | 0.57(0.32-1.01) | 0.054  |
| <b>Stroke at 1 year</b>                 |           |                 |       |                 |        |                 |       |                 |        |
| None/Mild                               | 612(9.4)  | Ref.(1.00)      |       | Ref.(1.00)      |        | Ref.(1.00)      |       | Ref.(1.00)      |        |
| Moderate                                | 417(9.6)  | 1.03(0.91-1.16) | 0.67  | 1.02(0.90-1.16) | 0.72   | 1.02(0.90-1.15) | 0.80  | 1.01(0.89-1.15) | 0.84   |
| Frequent/Severe                         | 160(9.3)  | 1.00(0.84-1.18) | 0.95  | 0.99(0.83-1.17) | 0.86   | 0.97(0.81-1.15) | 0.70  | 0.97(0.81-1.16) | 0.74   |
| <b>Ischaemic Stroke at 1 year</b>       |           |                 |       |                 |        |                 |       |                 |        |
| None/Mild                               | 568(8.7)  | Ref.(1.00)      |       | Ref.(1.00)      |        | Ref.(1.00)      |       | Ref.(1.00)      |        |
| Moderate                                | 384(8.8)  | 1.02(0.90-1.16) | 0.78  | 1.02(0.89-1.16) | 0.82   | 1.01(0.89-1.15) | 0.90  | 1.01(0.88-1.15) | 0.93   |
| Frequent/Severe                         | 145(8.5)  | 0.97(0.81-1.17) | 0.75  | 0.96(0.80-1.16) | 0.68   | 0.95(0.79-1.14) | 0.56  | 0.95(0.79-1.14) | 0.58   |

| <b>Hemorrhage stroke at 1 year</b>     |           |                 |       |                 |        |                 |       |                 |       |
|----------------------------------------|-----------|-----------------|-------|-----------------|--------|-----------------|-------|-----------------|-------|
| None/Mild                              | 53(0.8)   | Ref.(1.00)      |       | Ref.(1.00)      |        | Ref.(1.00)      |       | Ref.(1.00)      |       |
| Moderate                               | 34(0.8)   | 0.96(0.63-1.48) | 0.86  | 0.95(0.62-1.47) | 0.83   | 0.90(0.59-1.39) | 0.65  | 0.91(0.59-1.40) | 0.65  |
| Frequent/Severe                        | 19(1.1)   | 1.36(0.81-2.30) | 0.25  | 1.34(0.79-2.26) | 0.28   | 1.27(0.75-2.16) | 0.37  | 1.29(0.76-2.19) | 0.35  |
| <b>CVE at 1 year</b>                   |           |                 |       |                 |        |                 |       |                 |       |
| None/Mild                              | 644(9.9)  | Ref.(1.00)      |       | Ref.(1.00)      |        | Ref.(1.00)      |       | Ref.(1.00)      |       |
| Moderate                               | 438(10.1) | 1.03(0.91-1.16) | 0.68  | 1.02(0.90-1.15) | 0.75   | 1.02(0.90-1.15) | 0.81  | 1.01(0.90-1.14) | 0.84  |
| Frequent/Severe                        | 171(10.0) | 1.01(0.85-1.20) | 0.90  | 1.00(0.84-1.18) | 0.98   | 0.98(0.83-1.16) | 0.82  | 0.99(0.83-1.17) | 0.87  |
| <b>Disability(mRS 3-5) at 1 year**</b> |           |                 |       |                 |        |                 |       |                 |       |
| None/Mild                              | 680(11.0) | Ref.(1.00)      |       | Ref.(1.00)      |        | Ref.(1.00)      |       | Ref.(1.00)      |       |
| Moderate                               | 374(9.1)  | 0.81(0.71-0.92) | 0.002 | 0.79(0.69-0.91) | <0.001 | 0.79(0.68-0.91) | 0.001 | 0.79(0.68-0.91) | 0.001 |
| Frequent/Severe                        | 164(10.0) | 0.90(0.75-1.08) | 0.26  | 0.86(0.72-1.03) | 0.11   | 0.90(0.74-1.10) | 0.29  | 0.90(0.74-1.09) | 0.29  |
| <b>All-cause death at 1 year</b>       |           |                 |       |                 |        |                 |       |                 |       |
| None/Mild                              | 219(3.4)  | Ref.(1.00)      |       | Ref.(1.00)      |        | Ref.(1.00)      |       | Ref.(1.00)      |       |
| Moderate                               | 121(2.8)  | 0.83(0.66-1.03) | 0.10  | 0.83(0.66-1.03) | 0.09   | 0.85(0.68-1.07) | 0.16  | 0.85(0.68-1.07) | 0.16  |
| Frequent/Severe                        | 42(2.5)   | 0.73(0.52-1.01) | 0.06  | 0.70(0.50-0.97) | 0.03   | 0.76(0.55-1.06) | 0.11  | 0.76(0.54-1.05) | 0.10  |

Model 1: unadjusted;

Model 2: adjusted for age and sex;

Model 3: adjusted for age, sex, BMI, SBP, DBP, mRS, NIHSS, alcohol intake, tobacco intake, diabetes, hypertension, hyperlipidemia, stroke, CAD, index event, TOAST, lacunes, PV-WMH, and D-WMH.

Model 4: adjusted for age, sex, BMI, SBP, DBP, mRS, NIHSS, alcohol intake, tobacco intake, diabetes, hypertension, hyperlipidemia, stroke, CAD, index event, TOAST.

\*A total of 12304 patients with AIS/TIA were included in the analyses of the association between EPVS and disability because of 299 patients without available mRS score at 3-month follow-up.

\*\*A total of 11932 patients with AIS/TIA were included in the analyses of the association between EPVS and disability because of 671 patients without available mRS score at 1-year follow-up.

HR, hazard ratio; OR, odds ratio; CI, confidence interval, Ref, reference; CVE, combined vascular event; AIS, acute ischemic attack; TIA, transient ischemic attack; EPVS, enlarged perivascular spaces; BG-EPVS, EPVS in basal ganglia; CSO-EPVS, EPVS in centrum semiovale; BMI, body mass index; SBP, systolic blood pressure; DBP, diastolic blood pressure; CAD: coronary artery disease; NIHSS, National Institutes of Health Stroke Scale score; mRS, modified Rankin scale; TOAST, Trial of Org 10,172 in Acute Stroke Treatment; WMH, white matter hyperintensity; D-WMH, deep-WMH; PV-WMH, periventricular-WMH.

**Table S5. The associations between BG-EPVS and clinical outcomes of patients with small arterial occlusion**

| Outcomes                             | Events, n(%) | Model 1          |         | Model 2          |         | Model 3         |         | Model 4          |         |
|--------------------------------------|--------------|------------------|---------|------------------|---------|-----------------|---------|------------------|---------|
|                                      |              | HR/OR(95% CI)    | P value | HR/OR(95% CI)    | P value | HR/OR(95% CI)   | P value | HR/OR(95% CI)    | P value |
| <b>Stroke at 3 months</b>            |              |                  |         |                  |         |                 |         |                  |         |
| None/Mild                            | 84(4.6)      | Ref.(1.00)       |         | Ref.(1.00)       |         | Ref.(1.00)      |         | Ref.(1.00)       |         |
| Moderate                             | 37(4.8)      | 1.05(0.71-1.54)  | 0.82    | 1.06(0.71-1.58)  | 0.78    | 0.97(0.64-1.46) | 0.87    | 1.01(0.68-1.52)  | 0.95    |
| Frequent/Severe                      | 6(2.7)       | 0.59(0.26-1.34)  | 0.20    | 0.59(0.25-1.37)  | 0.22    | 0.48(0.20-1.15) | 0.10    | 0.55(0.24-1.30)  | 0.17    |
| <b>Ischaemic Stroke at 3 months</b>  |              |                  |         |                  |         |                 |         |                  |         |
| None/Mild                            | 79(4.3)      | Ref.(1.00)       |         | Ref.(1.00)       |         | Ref.(1.00)      |         | Ref.(1.00)       |         |
| Moderate                             | 34(4.4)      | 1.02(0.68-1.53)  | 0.91    | 1.04(0.69-1.58)  | 0.85    | 0.99(0.65-1.52) | 0.96    | 1.01(0.67-1.54)  | 0.95    |
| Frequent/Severe                      | 5(2.3)       | 0.52(0.21-1.28)  | 0.15    | 0.53(0.21-1.32)  | 0.17    | 0.46(0.18-1.18) | 0.11    | 0.50(0.20-1.28)  | 0.15    |
| <b>Hemorrhage stroke at 3 months</b> |              |                  |         |                  |         |                 |         |                  |         |
| None/Mild                            | 5(0.40)      | Ref.(1.00)       |         | Ref.(1.00)       |         | Ref.(1.00)      |         | Ref.(1.00)       |         |
| Moderate                             | 2(0.2)       | 1.91(0.51-7.10)  | 0.34    | 1.82(0.47-7.09)  | 0.39    | 1.11(0.29-4.31) | 0.88    | 1.46(0.37-5.75)  | 0.59    |
| Frequent/Severe                      | 3(0.7)       | 1.67(0.20-14.25) | 0.64    | 1.56(0.17-14.58) | 0.70    | 0.74(0.08-7.00) | 0.79    | 1.28(0.14-12.06) | 0.83    |
| <b>CVE at 3 months</b>               |              |                  |         |                  |         |                 |         |                  |         |
| None/Mild                            | 88(4.8)      | Ref.(1.00)       |         | Ref.(1.00)       |         | Ref.(1.00)      |         | Ref.(1.00)       |         |
| Moderate                             | 38(4.9)      | 1.03(0.70-1.50)  | 0.89    | 1.03(0.70-1.53)  | 0.87    | 0.95(0.63-1.42) | 0.79    | 0.99(0.67-1.47)  | 0.97    |

|                                         |          |                 |        |                 |      |                 |      |                 |       |
|-----------------------------------------|----------|-----------------|--------|-----------------|------|-----------------|------|-----------------|-------|
| Frequent/Severe                         | 6(2.7)   | 0.56(0.24-1.28) | 0.17   | 0.56(0.24-1.29) | 0.17 | 0.46(0.19-1.10) | 0.08 | 0.52(0.22-1.22) | 0.13  |
| <b>Disability(mRS 3-5) at 3 months*</b> |          |                 |        |                 |      |                 |      |                 |       |
| None/Mild                               | 95(5.2)  | Ref.(1.00)      |        | Ref.(1.00)      |      | Ref.(1.00)      |      | Ref.(1.00)      |       |
| Moderate                                | 63(8.3)  | 1.63(1.17-2.27) | 0.004  | 1.38(0.98-1.94) | 0.06 | 1.17(0.81-1.70) | 0.41 | 1.29(0.90-1.86) | 0.17  |
| Frequent/Severe                         | 24(11.0) | 2.23(1.39-3.58) | <0.001 | 1.60(0.98-2.62) | 0.06 | 1.38(0.80-2.40) | 0.25 | 1.70(0.99-2.90) | 0.052 |
| <b>All-cause death at 3 months</b>      |          |                 |        |                 |      |                 |      |                 |       |
| None/Mild                               | 4(0.2)   | Ref.(1.00)      |        | Ref.(1.00)      |      | Ref.(1.00)      |      | Ref.(1.00)      |       |
| Moderate                                | 3(0.4)   | 1.78(0.40-7.97) | 0.45   | 1.79(0.38-8.44) | 0.46 | 1.35(0.26-6.92) | 0.72 | 1.80(0.37-8.81) | 0.47  |
| Frequent/Severe                         | 0(0.0)   | -               | -      | -               | -    | -               | -    | -               | -     |
| <b>Stroke at 1 year</b>                 |          |                 |        |                 |      |                 |      |                 |       |
| None/Mild                               | 135(7.3) | Ref.(1.00)      |        | Ref.(1.00)      |      | Ref.(1.00)      |      | Ref.(1.00)      |       |
| Moderate                                | 63(8.1)  | 1.11(0.83-1.50) | 0.48   | 1.09(0.80-1.49) | 0.58 | 0.88(0.65-1.21) | 0.45 | 1.03(0.76-1.41) | 0.85  |
| Frequent/Severe                         | 15(6.8)  | 0.92(0.54-1.57) | 0.75   | 0.88(0.51-1.52) | 0.64 | 0.62(0.35-1.09) | 0.10 | 0.85(0.49-1.48) | 0.56  |
| <b>Ischaemic Stroke at 1 year</b>       |          |                 |        |                 |      |                 |      |                 |       |
| None/Mild                               | 123(6.7) | Ref.(1.00)      |        | Ref.(1.00)      |      | Ref.(1.00)      |      | Ref.(1.00)      |       |
| Moderate                                | 55(7.1)  | 1.06(0.77-1.46) | 0.70   | 1.04(0.75-1.44) | 0.82 | 0.88(0.63-1.23) | 0.45 | 1.00(0.71-1.39) | 0.98  |
| Frequent/Severe                         | 9(4.1)   | 0.60(0.31-1.19) | 0.14   | 0.57(0.29-1.14) | 0.11 | 0.43(0.21-0.87) | 0.02 | 0.56(0.28-1.11) | 0.10  |
| <b>Hemorrhage stroke at 1 year</b>      |          |                 |        |                 |      |                 |      |                 |       |

|                                        |          |                  |        |                  |       |                 |      |                  |       |
|----------------------------------------|----------|------------------|--------|------------------|-------|-----------------|------|------------------|-------|
| None/Mild                              | 12(0.7)  | Ref.(1.00)       |        | Ref.(1.00)       |       | Ref.(1.00)      |      | Ref.(1.00)       |       |
| Moderate                               | 9(1.2)   | 1.79(0.76-4.26)  | 0.19   | 1.86(0.76-4.55)  | 0.17  | 1.17(0.48-2.85) | 0.73 | 1.62(0.66-3.99)  | 0.30  |
| Frequent/Severe                        | 6(2.7)   | 4.27(1.60-11.37) | 0.004  | 4.61(1.59-13.35) | 0.005 | 2.40(0.82-7.08) | 0.11 | 4.29(1.45-12.71) | 0.009 |
| <b>CVE at 1 year</b>                   |          |                  |        |                  |       |                 |      |                  |       |
| None/Mild                              | 141(7.7) | Ref.(1.00)       |        | Ref.(1.00)       |       | Ref.(1.00)      |      | Ref.(1.00)       |       |
| Moderate                               | 66(8.5)  | 1.12(0.83-1.50)  | 0.46   | 1.10(0.81-1.48)  | 0.56  | 0.88(0.65-1.20) | 0.42 | 1.03(0.76-1.40)  | 0.83  |
| Frequent/Severe                        | 16(7.2)  | 0.94(0.56-1.57)  | 0.81   | 0.90(0.53-1.53)  | 0.69  | 0.63(0.36-1.09) | 0.10 | 0.86(0.50-1.48)  | 0.59  |
| <b>Disability(mRS 3-5) at 1 year**</b> |          |                  |        |                  |       |                 |      |                  |       |
| None/Mild                              | 49(6.6)  | Ref.(1.00)       |        | Ref.(1.00)       |       | Ref.(1.00)      |      | Ref.(1.00)       |       |
| Moderate                               | 17(8.3)  | 1.44(1.00-2.08)  | 0.048  | 1.02(0.70-1.49)  | 0.92  | 0.80(0.53-1.20) | 0.28 | 0.91(0.61-1.35)  | 0.63  |
| Frequent/Severe                        |          | 1.87(1.09-3.22)  | 0.02   | 0.97(0.55-1.71)  | 0.92  | 0.81(0.44-1.48) | 0.49 | 1.02(0.56-1.84)  | 0.95  |
| <b>All-cause death at 1 year</b>       |          |                  |        |                  |       |                 |      |                  |       |
| None/Mild                              | 14(0.8)  | Ref.(1.00)       |        | Ref.(1.00)       |       | Ref.(1.00)      |      | Ref.(1.00)       |       |
| Moderate                               | 12(1.6)  | 2.04(0.95-4.42)  | 0.07   | 1.66(0.76-3.67)  | 0.21  | 1.25(0.56-2.78) | 0.59 | 1.52(0.69-3.38)  | 0.30  |
| Frequent/Severe                        | 8(3.6)   | 4.84(2.03-11.55) | <0.001 | 3.31(1.32-8.30)  | 0.01  | 2.18(0.84-5.65) | 0.11 | 3.13(1.23-7.99)  | 0.02  |

Model 1: unadjusted;

Model 2: adjusted for age and sex;

Model 3: adjusted for age, sex, BMI, SBP, DBP, mRS, NIHSS, alcohol intake, tobacco intake, diabetes, hypertension, hyperlipidemia, stroke, CAD,

index event, TOAST, lacunes, PV-WMH, and D-WMH.

Model 4: adjusted for age, sex, BMI, SBP, DBP, mRS, NIHSS, alcohol intake, tobacco intake, diabetes, hypertension, hyperlipidemia, stroke, CAD, index event, TOAST.

\*A total of 2798 patients with AIS/TIA were included in the analyses of the association between EPVS and disability because of 41 patients without available mRS score at 3-month follow-up.

\*\*A total of 2744 patients with AIS/TIA were included in the analyses of the association between EPVS and disability because of 95 patients without available mRS score at 1-year follow-up.

HR, hazard ratio; OR, odds ratio; CI, confidence interval, Ref, reference; CVE, combined vascular event; EPVS, enlarged perivascular spaces; BG-EPVS, EPVS in basal ganglia; CSO-EPVS, EPVS in centrum semiovale; BMI, body mass index; SBP, systolic blood pressure; DBP, diastolic blood pressure; CAD: coronary artery disease; NIHSS, National Institutes of Health Stroke Scale score; mRS, modified Rankin scale; TOAST, Trial of Org 10,172 in Acute Stroke Treatment; WMH, white matter hyperintensity; D-WMH, deep-WMH; PV-WMH, periventricular-WMH.



**Table S6. The associations between CSO-EPVS and clinical outcomes of patients with small arterial occlusion**

| Outcomes                             | Events, n(%) | Model 1         |         | Model 2         |         | Model 3         |         | Model 4         |         |
|--------------------------------------|--------------|-----------------|---------|-----------------|---------|-----------------|---------|-----------------|---------|
|                                      |              | HR/OR(95% CI)   | P value |
| <b>Stroke at 3 months</b>            |              |                 |         |                 |         |                 |         |                 |         |
| None/Mild                            | 71(4.9)      | Ref.(1.00)      |         | Ref.(1.00)      |         | Ref.(1.00)      |         | Ref.(1.00)      |         |
| Moderate                             | 42(4.3)      | 0.87(0.59-1.27) | 0.47    | 0.89(0.61-1.30) | 0.54    | 0.89(0.61-1.32) | 0.57    | 0.86(0.59-1.27) | 0.46    |
| Frequent/Severe                      | 14(3.3)      | 0.67(0.38-1.19) | 0.17    | 0.69(0.39-1.23) | 0.21    | 0.66(0.37-1.17) | 0.16    | 0.64(0.36-1.15) | 0.13    |
| <b>Ischaemic Stroke at 3 months</b>  |              |                 |         |                 |         |                 |         |                 |         |
| None/Mild                            | 66(4.6)      | Ref.(1.00)      |         | Ref.(1.00)      |         | Ref.(1.00)      |         | Ref.(1.00)      |         |
| Moderate                             | 41(4.2)      | 0.91(0.62-1.35) | 0.64    | 0.94(0.63-1.38) | 0.74    | 0.94(0.63-1.40) | 0.76    | 0.91(0.62-1.35) | 0.65    |
| Frequent/Severe                      | 11(2.6)      | 0.57(0.30-1.07) | 0.08    | 0.59(0.31-1.12) | 0.10    | 0.57(0.30-1.08) | 0.09    | 0.55(0.29-1.05) | 0.07    |
| <b>Hemorrhage stroke at 3 months</b> |              |                 |         |                 |         |                 |         |                 |         |
| None/Mild                            | 5(0.4)       | Ref.(1.00)      |         | Ref.(1.00)      |         | Ref.(1.00)      |         | Ref.(1.00)      |         |
| Moderate                             | 2(0.2)       | 0.59(0.11-3.03) | 0.53    | 0.57(0.11-2.95) | 0.50    | 0.62(0.12-3.23) | 0.57    | 0.55(0.11-2.83) | 0.47    |
| Frequent/Severe                      | 3(0.7)       | 2.06(0.49-8.62) | 0.32    | 1.96(0.47-8.24) | 0.36    | 1.65(0.38-7.08) | 0.50    | 1.61(0.38-6.88) | 0.52    |
| <b>CVE at 3 months</b>               |              |                 |         |                 |         |                 |         |                 |         |
| None/Mild                            | 73(5.1)      | Ref.(1.00)      |         | Ref.(1.00)      |         | Ref.(1.00)      |         | Ref.(1.00)      |         |
| Moderate                             | 44(4.5)      | 0.89(0.61-1.29) | 0.52    | 0.91(0.62-1.32) | 0.60    | 0.90(0.62-1.32) | 0.60    | 0.88(0.60-1.28) | 0.50    |

|                                         |          |                 |      |                 |       |                 |      |                 |      |
|-----------------------------------------|----------|-----------------|------|-----------------|-------|-----------------|------|-----------------|------|
| Frequent/Severe                         | 15(3.6)  | 0.70(0.40-1.22) | 0.21 | 0.72(0.41-1.26) | 0.25  | 0.69(0.39-1.20) | 0.19 | 0.68(0.39-1.18) | 0.17 |
| <b>Disability(mRS 3-5) at 3 months*</b> |          |                 |      |                 |       |                 |      |                 |      |
| None/Mild                               | 96(6.8)  | Ref.(1.00)      |      | Ref.(1.00)      |       | Ref.(1.00)      |      | Ref.(1.00)      |      |
| Moderate                                | 59(6.1)  | 0.90(0.64-1.26) | 0.53 | 0.93(0.66-1.30) | 0.66  | 0.94(0.65-1.35) | 0.74 | 0.89(0.62-1.27) | 0.51 |
| Frequent/Severe                         | 27(6.5)  | 0.96(0.62-1.50) | 0.86 | 0.96(0.62-1.50) | 0.86  | 0.88(0.54-1.41) | 0.59 | 0.86(0.53-1.38) | 0.53 |
| <b>All-cause death at 3 months</b>      |          |                 |      |                 |       |                 |      |                 |      |
| None/Mild                               | 5(0.4)   | Ref.(1.00)      |      | Ref.(1.00)      |       | Ref.(1.00)      |      | Ref.(1.00)      |      |
| Moderate                                | 1(0.1)   | 0.29(0.03-2.52) | 0.26 | 0.31(0.04-2.62) | 0.28  | 0.29(0.03-2.59) | 0.27 | 0.31(0.04-2.71) | 0.29 |
| Frequent/Severe                         | 1(0.2)   | 0.68(0.08-5.86) | 0.73 | 0.72(0.08-6.18) | 0.76  | 0.77(0.09-6.86) | 0.81 | 0.75(0.09-6.61) | 0.80 |
| <b>Stroke at 1 year</b>                 |          |                 |      |                 |       |                 |      |                 |      |
| None/Mild                               | 118(8.2) | Ref.(1.00)      |      | Ref.(1.00)      |       | Ref.(1.00)      |      | Ref.(1.00)      |      |
| Moderate                                | 69(7.1)  | 0.86(0.64-1.15) | 0.30 | 0.86(0.64-1.16) | 0.34  | 0.89(0.66-1.20) | 0.43 | 0.84(0.62-1.13) | 0.25 |
| Frequent/Severe                         | 26(6.2)  | 0.74(0.49-1.14) | 0.17 | 0.75(0.49-1.15) | 0.19  | 0.71(0.46-1.09) | 0.11 | 0.70(0.46-1.08) | 0.11 |
| <b>Ischaemic Stroke at 1 year</b>       |          |                 |      |                 |       |                 |      |                 |      |
| None/Mild                               | 109(7.4) | Ref.(1.00)      |      | Ref.(1.00)      |       | Ref.(1.00)      |      | Ref.(1.00)      |      |
| Moderate                                | 61(6.2)  | 0.84(0.61-1.15) | 0.26 | 0.85(0.62-1.16) | 0.30  | 0.87(0.63-1.19) | 0.38 | 0.83(0.60-1.14) | 0.24 |
| Frequent/Severe                         | 19(4.5)  | 0.60(0.37-0.98) | 0.04 | 0.61(0.37-0.99) | 0.046 | 0.58(0.35-0.95) | 0.03 | 0.58(0.35-0.94) | 0.03 |

| <b>Hemorrhage stroke at 1 year</b>     |          |                 |       |                 |       |                 |      |                 |       |
|----------------------------------------|----------|-----------------|-------|-----------------|-------|-----------------|------|-----------------|-------|
| None/Mild                              | 11(0.8)  | Ref.(1.00)      |       | Ref.(1.00)      |       | Ref.(1.00)      |      | Ref.(1.00)      |       |
| Moderate                               | 9(0.9)   | 1.20(0.50-2.89) | 0.69  | 1.18(0.49-2.84) | 0.72  | 1.27(0.51-3.12) | 0.61 | 1.10(0.45-2.67) | 0.83  |
| Frequent/Severe                        | 7(1.7)   | 2.17(0.84-5.61) | 0.11  | 2.10(0.81-5.43) | 0.13  | 1.95(0.75-5.09) | 0.17 | 1.88(0.72-4.90) | 0.19  |
| <b>CVE at 1 year</b>                   |          |                 |       |                 |       |                 |      |                 |       |
| None/Mild                              | 123(8.5) | Ref.(1.00)      |       | Ref.(1.00)      |       | Ref.(1.00)      |      | Ref.(1.00)      |       |
| Moderate                               | 72(7.4)  | 0.86(0.64-1.15) | 0.30  | 0.87(0.65-1.16) | 0.34  | 0.89(0.66-1.19) | 0.42 | 0.84(0.63-1.13) | 0.25  |
| Frequent/Severe                        | 28(6.7)  | 0.77(0.51-1.16) | 0.21  | 0.78(0.51-1.17) | 0.23  | 0.73(0.48-1.11) | 0.14 | 0.73(0.48-1.10) | 0.13  |
| <b>Disability(mRS 3-5) at 1 year**</b> |          |                 |       |                 |       |                 |      |                 |       |
| None/Mild                              | 91(6.5)  | Ref.(1.00)      |       | Ref.(1.00)      |       | Ref.(1.00)      |      | Ref.(1.00)      |       |
| Moderate                               | 37(3.9)  | 0.58(0.39-0.86) | 0.007 | 0.59(0.40-0.88) | 0.009 | 0.59(0.39-0.90) | 0.01 | 0.56(0.37-0.84) | 0.006 |
| Frequent/Severe                        | 21(5.2)  | 0.78(0.48-1.26) | 0.31  | 0.74(0.45-1.21) | 0.23  | 0.65(0.38-1.09) | 0.10 | 0.64(0.38-1.07) | 0.09  |
| <b>All-cause death at 1 year</b>       |          |                 |       |                 |       |                 |      |                 |       |
| None/Mild                              | 18(1.3)  | Ref.(1.00)      |       | Ref.(1.00)      |       | Ref.(1.00)      |      | Ref.(1.00)      |       |
| Moderate                               | 9(0.9)   | 0.74(0.33-1.64) | 0.45  | 0.75(0.34-1.67) | 0.48  | 0.78(0.35-1.78) | 0.56 | 0.73(0.33-1.64) | 0.45  |
| Frequent/Severe                        | 7(1.7)   | 1.33(0.55-3.17) | 0.53  | 1.27(0.53-3.05) | 0.59  | 1.20(0.49-2.93) | 0.69 | 1.14(0.47-2.78) | 0.77  |

Model 1: unadjusted;

Model 2: adjusted for age and sex;

Model 3: adjusted for age, sex, BMI, SBP, DBP, mRS, NIHSS, alcohol intake, tobacco intake, diabetes, hypertension, hyperlipidemia, stroke, CAD, index event, TOAST, lacunes, PV-WMH, and D-WMH.

Model 4: adjusted for age, sex, BMI, SBP, DBP, mRS, NIHSS, alcohol intake, tobacco intake, diabetes, hypertension, hyperlipidemia, stroke, CAD, index event, TOAST.

\*A total of 2798 patients with AIS/TIA were included in the analyses of the association between EPVS and disability because of 41 patients without available mRS score at 3-month follow-up.

\*\*A total of 2744 patients with AIS/TIA were included in the analyses of the association between EPVS and disability because of 95 patients without available mRS score at 1-year follow-up.

HR, hazard ratio; OR, odds ratio; CI, confidence interval, Ref, reference; CVE, combined vascular event; EPVS, enlarged perivascular spaces; BG-EPVS, EPVS in basal ganglia; CSO-EPVS, EPVS in centrum semiovale; BMI, body mass index; SBP, systolic blood pressure; DBP, diastolic blood pressure; CAD: coronary artery disease; NIHSS, National Institutes of Health Stroke Scale score; mRS, modified Rankin scale; TOAST, Trial of Org 10,172 in Acute Stroke Treatment; WMH, white matter hyperintensity; D-WMH, deep-WMH; PV-WMH, periventricular-WMH.

**Table S7. The associations between BG-EPVS and clinical outcomes of patients with cerebral small vessel disease**

| Outcomes                             | Events, n(%) | Model 1         |         | Model 2         |         | Model 3         |         | Model 4         |         |
|--------------------------------------|--------------|-----------------|---------|-----------------|---------|-----------------|---------|-----------------|---------|
|                                      |              | HR/OR(95% CI)   | P value |
| <b>Stroke at 3 months</b>            |              |                 |         |                 |         |                 |         |                 |         |
| None/Mild                            | 161(6.3)     | Ref.(1.00)      |         | Ref.(1.00)      |         | Ref.(1.00)      |         | Ref.(1.00)      |         |
| Moderate                             | 115(6.5)     | 1.05(0.82-1.33) | 0.71    | 1.00(0.78-1.27) | 0.97    | 0.99(0.78-1.27) | 0.96    | 1.01(0.79-1.28) | 0.96    |
| Frequent/Severe                      | 24(5.4)      | 0.87(0.56-1.33) | 0.51    | 0.76(0.49-1.18) | 0.22    | 0.75(0.48-1.17) | 0.20    | 0.82(0.53-1.26) | 0.37    |
| <b>Ischaemic Stroke at 3 months</b>  |              |                 |         |                 |         |                 |         |                 |         |
| None/Mild                            | 155(6.0)     | Ref.(1.00)      |         | Ref.(1.00)      |         | Ref.(1.00)      |         | Ref.(1.00)      |         |
| Moderate                             | 108(6.1)     | 1.02(0.80-1.31) | 0.87    | 0.97(0.76-1.25) | 0.82    | 0.97(0.76-1.25) | 0.83    | 0.99(0.77-1.27) | 0.91    |
| Frequent/Severe                      | 22(5.0)      | 0.83(0.53-1.29) | 0.40    | 0.73(0.46-1.15) | 0.17    | 0.72(0.45-1.14) | 0.16    | 0.75(0.47-1.18) | 0.21    |
| <b>Hemorrhage stroke at 3 months</b> |              |                 |         |                 |         |                 |         |                 |         |
| None/Mild                            | 10(0.4)      | Ref.(1.00)      |         | Ref.(1.00)      |         | Ref.(1.00)      |         | Ref.(1.00)      |         |
| Moderate                             | 9(0.5)       | 1.32(0.54-3.24) | 0.55    | 1.22(0.49-3.03) | 0.68    | 1.29(0.52-3.24) | 0.59    | 1.19(0.49-2.92) | 0.70    |
| Frequent/Severe                      | 2(0.5)       | 1.17(0.26-5.33) | 0.84    | 0.99(0.21-4.71) | 0.99    | 0.93(0.19-4.46) | 0.93    | 1.64(0.43-6.17) | 0.47    |
| <b>CVE at 3 months</b>               |              |                 |         |                 |         |                 |         |                 |         |
| None/Mild                            | 163(6.3)     | Ref.(1.00)      |         | Ref.(1.00)      |         | Ref.(1.00)      |         | Ref.(1.00)      |         |
| Moderate                             | 119(6.7)     | 1.07(0.85-1.36) | 0.57    | 1.01(0.79-1.28) | 0.94    | 1.01(0.80-1.29) | 0.92    | 1.03(0.81-1.31) | 0.81    |

|                                         |           |                 |      |                 |      |                 |      |                 |      |
|-----------------------------------------|-----------|-----------------|------|-----------------|------|-----------------|------|-----------------|------|
| Frequent/Severe                         | 24(5.4)   | 0.86(0.56-1.31) | 0.48 | 0.74(0.48-1.15) | 0.18 | 0.74(0.47-1.15) | 0.18 | 0.80(0.52-1.23) | 0.31 |
| <b>Disability(mRS 3-5) at 3 months*</b> |           |                 |      |                 |      |                 |      |                 |      |
| None/Mild                               | 330(13.1) | Ref.(1.00)      |      | Ref.(1.00)      |      | Ref.(1.00)      |      | Ref.(1.00)      |      |
| Moderate                                | 247(14.3) | 1.11(0.93-1.33) | 0.25 | 0.97(0.81-1.16) | 0.73 | 1.01(0.83-1.24) | 0.92 | 1.04(0.85-1.27) | 0.71 |
| Frequent/Severe                         | 56(13.2)  | 1.01(0.74-1.36) | 0.97 | 0.74(0.54-1.02) | 0.06 | 0.84(0.59-1.18) | 0.31 | 0.95(0.68-1.33) | 0.76 |
| <b>All-cause death at 3 months</b>      |           |                 |      |                 |      |                 |      |                 |      |
| None/Mild                               | 30(1.2)   | Ref.(1.00)      |      | Ref.(1.00)      |      | Ref.(1.00)      |      | Ref.(1.00)      |      |
| Moderate                                | 18(1.0)   | 0.88(0.49-1.57) | 0.66 | 0.68(0.37-1.22) | 0.19 | 0.73(0.40-1.34) | 0.31 | 0.75(0.42-1.35) | 0.34 |
| Frequent/Severe                         | 8(1.8)    | 1.56(0.71-3.40) | 0.27 | 0.87(0.39-1.92) | 0.72 | 1.11(0.48-2.54) | 0.81 | 1.11(0.49-2.53) | 0.81 |
| <b>Stroke at 1 year</b>                 |           |                 |      |                 |      |                 |      |                 |      |
| None/Mild                               | 256(9.9)  | Ref.(1.00)      |      | Ref.(1.00)      |      | Ref.(1.00)      |      | Ref.(1.00)      |      |
| Moderate                                | 174(9.9)  | 1.00(0.82-1.21) | 0.99 | 0.96(0.79-1.17) | 0.71 | 0.95(0.78-1.16) | 0.64 | 0.97(0.80-1.18) | 0.79 |
| Frequent/Severe                         | 43(9.7)   | 0.98(0.71-1.36) | 0.91 | 0.90(0.64-1.25) | 0.51 | 0.84(0.60-1.17) | 0.31 | 0.95(0.68-1.31) | 0.73 |
| <b>Ischaemic Stroke at 1 year</b>       |           |                 |      |                 |      |                 |      |                 |      |
| None/Mild                               | 236(9.2)  | Ref.(1.00)      |      | Ref.(1.00)      |      | Ref.(1.00)      |      | Ref.(1.00)      |      |
| Moderate                                | 160(9.1)  | 1.00(0.81-1.22) | 0.96 | 0.95(0.77-1.16) | 0.62 | 0.94(0.77-1.16) | 0.58 | 0.97(0.79-1.18) | 0.73 |
| Frequent/Severe                         | 37(9.4)   | 0.92(0.65-1.30) | 0.62 | 0.82(0.57-1.16) | 0.26 | 0.78(0.54-1.12) | 0.17 | 0.85(0.59-1.20) | 0.35 |

| <b>Hemorrhage stroke at 1 year</b>     |           |                 |      |                 |       |                 |      |                 |      |
|----------------------------------------|-----------|-----------------|------|-----------------|-------|-----------------|------|-----------------|------|
| None/Mild                              | 24(0.9)   | Ref.(1.00)      |      | Ref.(1.00)      |       | Ref.(1.00)      |      | Ref.(1.00)      |      |
| Moderate                               | 17(1.0)   | 1.04(0.56-1.93) | 0.90 | 1.11(0.59-2.09) | 0.74  | 1.07(0.57-2.02) | 0.84 | 1.04(0.55-1.93) | 0.91 |
| Frequent/Severe                        | 6(1.4)    | 1.47(0.60-3.60) | 0.40 | 1.71(0.68-4.33) | 0.26  | 1.33(0.52-3.39) | 0.55 | 1.92(0.80-4.58) | 0.14 |
| <b>CVE at 1 year</b>                   |           |                 |      |                 |       |                 |      |                 |      |
| None/Mild                              | 269(10.4) | Ref.(1.00)      |      | Ref.(1.00)      |       | Ref.(1.00)      |      | Ref.(1.00)      |      |
| Moderate                               | 184(10.4) | 1.01(0.83-1.21) | 0.95 | 0.97(0.80-1.17) | 0.74  | 0.96(0.79-1.17) | 0.69 | 0.99(0.82-1.19) | 0.87 |
| Frequent/Severe                        | 45(10.2)  | 0.98(0.71-1.34) | 0.89 | 0.89(0.64-1.23) | 0.48  | 0.85(0.61-1.18) | 0.32 | 0.94(0.69-1.30) | 0.72 |
| <b>Disability(mRS 3-5) at 1 year**</b> |           |                 |      |                 |       |                 |      |                 |      |
| None/Mild                              | 266(10.9) | Ref.(1.00)      |      | Ref.(1.00)      |       | Ref.(1.00)      |      | Ref.(1.00)      |      |
| Moderate                               | 203(12.2) | 1.14(0.94-1.38) | 0.19 | 0.92(0.76-1.13) | 0.44  | 0.96(0.77-1.20) | 0.72 | 0.99(0.80-1.22) | 0.90 |
| Frequent/Severe                        | 49(12.1)  | 1.13(0.81-1.56) | 0.47 | 0.71(0.51-0.99) | 0.045 | 0.80(0.56-1.15) | 0.22 | 0.92(0.65-1.31) | 0.65 |
| <b>All-cause death at 1 year</b>       |           |                 |      |                 |       |                 |      |                 |      |
| None/Mild                              | 80(3.1)   | Ref.(1.00)      |      | Ref.(1.00)      |       | Ref.(1.00)      |      | Ref.(1.00)      |      |
| Moderate                               | 59(3.3)   | 1.08(0.77-1.51) | 0.66 | 0.86(0.62-1.21) | 0.40  | 0.89(0.63-1.25) | 0.50 | 0.91(0.65-1.27) | 0.57 |
| Frequent/Severe                        | 23(5.2)   | 1.70(1.07-2.70) | 0.02 | 1.04(0.65-1.67) | 0.88  | 1.11(0.68-1.80) | 0.67 | 1.24(0.77-2.01) | 0.38 |

Model 1: unadjusted;

Model 2: adjusted for age and sex;

Model 3: adjusted for age, sex, BMI, SBP, DBP, mRS, NIHSS, alcohol intake, tobacco intake, diabetes, hypertension, hyperlipidemia, stroke, CAD, index event, TOAST, lacunes, PV-WMH, and D-WMH.

Model 4: adjusted for age, sex, BMI, SBP, DBP, mRS, NIHSS, alcohol intake, tobacco intake, diabetes, hypertension, hyperlipidemia, stroke, CAD, index event, TOAST.

\*A total of 4663 patients with AIS/TIA were included in the analyses of the association between EPVS and disability because of 122 patients without available mRS score at 3-month follow-up.

\*\*A total of 4522 patients with AIS/TIA were included in the analyses of the association between EPVS and disability because of 263 patients without available mRS score at 1-year follow-up.

HR, hazard ratio; OR, odds ratio; CI, confidence interval, Ref, reference; CVE, combined vascular event; EPVS, enlarged perivascular spaces; BG-EPVS, EPVS in basal ganglia; CSO-EPVS, EPVS in centrum semiovale; BMI, body mass index; SBP, systolic blood pressure; DBP, diastolic blood pressure; CAD: coronary artery disease; NIHSS, National Institutes of Health Stroke Scale score; mRS, modified Rankin scale; TOAST, Trial of Org 10,172 in Acute Stroke Treatment; WMH, white matter hyperintensity; D-WMH, deep-WMH; PV-WMH, periventricular-WMH.



**Table S8. The associations between CSO-EPVS and clinical outcomes of patients with cerebral small vessel disease**

| Outcomes                             | Events, n(%) | Model 1         |         | Model 2         |         | Model 3         |         | Model 4         |         |
|--------------------------------------|--------------|-----------------|---------|-----------------|---------|-----------------|---------|-----------------|---------|
|                                      |              | HR/OR(95% CI)   | P value |
| <b>Stroke at 3 months</b>            |              |                 |         |                 |         |                 |         |                 |         |
| None/Mild                            | 141(6.3)     | Ref.(1.00)      |         | Ref.(1.00)      |         | Ref.(1.00)      |         | Ref.(1.00)      |         |
| Moderate                             | 107(6.1)     | 0.97(0.75-1.25) | 0.80    | 0.98(0.76-1.26) | 0.89    | 1.00(0.78-1.29) | 0.99    | 1.01(0.78-1.29) | 0.97    |
| Frequent/Severe                      | 52(6.7)      | 1.07(0.78-1.47) | 0.67    | 1.09(0.79-1.49) | 0.62    | 1.09(0.79-1.50) | 0.62    | 1.04(0.75-1.43) | 0.82    |
| <b>Ischaemic Stroke at 3 months</b>  |              |                 |         |                 |         |                 |         |                 |         |
| None/Mild                            | 134(6.0)     | Ref.(1.00)      |         | Ref.(1.00)      |         | Ref.(1.00)      |         | Ref.(1.00)      |         |
| Moderate                             | 102(5.8)     | 0.97(0.75-1.26) | 0.83    | 0.99(0.76-1.27) | 0.91    | 1.00(0.77-1.29) | 0.99    | 0.99(0.77-1.28) | 0.93    |
| Frequent/Severe                      | 49(6.3)      | 1.06(0.77-1.47) | 0.72    | 1.08(0.78-1.49) | 0.66    | 1.08(0.78-1.50) | 0.66    | 1.03(0.74-1.43) | 0.86    |
| <b>Hemorrhage stroke at 3 months</b> |              |                 |         |                 |         |                 |         |                 |         |
| None/Mild                            | 9(0.4)       | Ref.(1.00)      |         | Ref.(1.00)      |         | Ref.(1.00)      |         | Ref.(1.00)      |         |
| Moderate                             | 6(0.3)       | 0.85(0.30-2.39) | 0.76    | 0.85(0.30-2.40) | 0.76    | 0.93(0.33-2.65) | 0.89    | 1.17(0.45-3.05) | 0.75    |
| Frequent/Severe                      | 6(0.8)       | 1.93(0.69-5.42) | 0.21    | 1.90(0.68-5.35) | 0.22    | 1.91(0.66-5.50) | 0.23    | 1.87(0.66-5.33) | 0.24    |
| <b>CVE at 3 months</b>               |              |                 |         |                 |         |                 |         |                 |         |
| None/Mild                            | 146(6.5)     | Ref.(1.00)      |         | Ref.(1.00)      |         | Ref.(1.00)      |         | Ref.(1.00)      |         |
| Moderate                             | 108(6.1)     | 0.94(0.74-1.21) | 0.65    | 0.96(0.75-1.23) | 0.73    | 0.97(0.76-1.25) | 0.84    | 0.98(0.77-1.26) | 0.88    |

|                                         |           |                 |       |                 |       |                 |      |                 |       |
|-----------------------------------------|-----------|-----------------|-------|-----------------|-------|-----------------|------|-----------------|-------|
| Frequent/Severe                         | 52(6.7)   | 1.04(0.75-1.42) | 0.83  | 1.05(0.76-1.44) | 0.78  | 1.05(0.76-1.44) | 0.77 | 1.03(0.75-1.41) | 0.87  |
| <b>Disability(mRS 3-5) at 3 months*</b> |           |                 |       |                 |       |                 |      |                 |       |
| None/Mild                               | 329(15.0) | Ref.(1.00)      |       | Ref.(1.00)      |       | Ref.(1.00)      |      | Ref.(1.00)      |       |
| Moderate                                | 212(12.4) | 0.80(0.66-0.96) | 0.02  | 0.81(0.67-0.98) | 0.03  | 0.81(0.66-0.99) | 0.04 | 0.80(0.66-0.98) | 0.03  |
| Frequent/Severe                         | 92(12.1)  | 0.78(0.61-1.00) | 0.045 | 0.78(0.61-1.00) | 0.049 | 0.80(0.61-1.05) | 0.10 | 0.76(0.58-0.99) | 0.045 |
| <b>All-cause death at 3 months</b>      |           |                 |       |                 |       |                 |      |                 |       |
| None/Mild                               | 33(1.5)   | Ref.(1.00)      |       | Ref.(1.00)      |       | Ref.(1.00)      |      | Ref.(1.00)      |       |
| Moderate                                | 17(1.0)   | 0.66(0.37-1.18) | 0.16  | 0.71(0.39-1.27) | 0.24  | 0.75(0.41-1.38) | 0.36 | 0.76(0.42-1.38) | 0.36  |
| Frequent/Severe                         | 6(0.8)    | 0.53(0.22-1.25) | 0.15  | 0.54(0.23-1.28) | 0.16  | 0.61(0.25-1.49) | 0.28 | 0.74(0.32-1.69) | 0.48  |
| <b>Stroke at 1 year</b>                 |           |                 |       |                 |       |                 |      |                 |       |
| None/Mild                               | 226(10.0) | Ref.(1.00)      |       | Ref.(1.00)      |       | Ref.(1.00)      |      | Ref.(1.00)      |       |
| Moderate                                | 167(9.5)  | 0.94(0.77-1.15) | 0.57  | 0.95(0.78-1.16) | 0.63  | 0.98(0.80-1.20) | 0.83 | 0.96(0.79-1.16) | 0.65  |
| Frequent/Severe                         | 80(10.3)  | 1.02(0.79-1.32) | 0.86  | 1.03(0.80-1.33) | 0.82  | 1.05(0.81-1.35) | 0.73 | 0.99(0.77-1.27) | 0.92  |
| <b>Ischaemic Stroke at 1 year</b>       |           |                 |       |                 |       |                 |      |                 |       |
| None/Mild                               | 208(9.2)  | Ref.(1.00)      |       | Ref.(1.00)      |       | Ref.(1.00)      |      | Ref.(1.00)      |       |
| Moderate                                | 152(8.6)  | 0.93(0.76-1.15) | 0.51  | 0.94(0.77-1.16) | 0.58  | 0.97(0.78-1.19) | 0.76 | 0.94(0.76-1.15) | 0.54  |
| Frequent/Severe                         | 73(9.4)   | 1.02(0.78-1.33) | 0.91  | 1.02(0.78-1.34) | 0.87  | 1.04(0.80-1.36) | 0.77 | 0.98(0.75-1.28) | 0.89  |

| <b>Hemorrhage stroke at 1 year</b>     |           |                 |       |                 |       |                 |       |                 |       |
|----------------------------------------|-----------|-----------------|-------|-----------------|-------|-----------------|-------|-----------------|-------|
| None/Mild                              | 21(0.9)   | Ref.(1.00)      |       | Ref.(1.00)      |       | Ref.(1.00)      |       | Ref.(1.00)      |       |
| Moderate                               | 16(0.9)   | 0.97(0.51-1.86) | 0.93  | 0.96(0.50-1.85) | 0.91  | 0.99(0.51-1.91) | 0.98  | 1.05(0.56-1.98) | 0.88  |
| Frequent/Severe                        | 10(1.3)   | 1.37(0.65-2.91) | 0.41  | 1.37(0.64-2.90) | 0.42  | 1.36(0.63-2.92) | 0.43  | 1.44(0.69-3.01) | 0.33  |
| <b>CVE at 1 year</b>                   |           |                 |       |                 |       |                 |       |                 |       |
| None/Mild                              | 242(10.8) | Ref.(1.00)      |       | Ref.(1.00)      |       | Ref.(1.00)      |       | Ref.(1.00)      |       |
| Moderate                               | 173(9.8)  | 0.91(0.75-1.11) | 0.35  | 0.92(0.76-1.12) | 0.41  | 0.94(0.78-1.15) | 0.57  | 0.93(0.77-1.12) | 0.44  |
| Frequent/Severe                        | 83(10.7)  | 0.99(0.77-1.27) | 0.94  | 1.00(0.78-1.28) | 0.98  | 1.01(0.79-1.30) | 0.94  | 0.97(0.76-1.24) | 0.81  |
| <b>Disability(mRS 3-5) at 1 year**</b> |           |                 |       |                 |       |                 |       |                 |       |
| None/Mild                              | 273(12.9) | Ref.(1.00)      |       | Ref.(1.00)      |       | Ref.(1.00)      |       | Ref.(1.00)      |       |
| Moderate                               | 161(9.7)  | 0.72(0.59-0.89) | 0.002 | 0.73(0.59-0.90) | 0.004 | 0.73(0.58-0.91) | 0.006 | 0.71(0.57-0.89) | 0.003 |
| Frequent/Severe                        | 84(11.3)  | 0.86(0.66-1.11) | 0.24  | 0.85(0.65-1.10) | 0.22  | 0.88(0.66-1.17) | 0.38  | 0.84(0.63-1.11) | 0.21  |
| <b>All-cause death at 1 year</b>       |           |                 |       |                 |       |                 |       |                 |       |
| None/Mild                              | 88(3.9)   | Ref.(1.00)      |       | Ref.(1.00)      |       | Ref.(1.00)      |       | Ref.(1.00)      |       |
| Moderate                               | 53(3.0)   | 0.77(0.55-1.08) | 0.13  | 0.81(0.57-1.13) | 0.21  | 0.85(0.60-1.20) | 0.36  | 0.83(0.59-1.17) | 0.28  |
| Frequent/Severe                        | 21(2.7)   | 0.68(0.42-1.10) | 0.12  | 0.68(0.42-1.10) | 0.12  | 0.76(0.47-1.24) | 0.27  | 0.84(0.54-1.32) | 0.45  |

Model 1: unadjusted;

Model 2: adjusted for age and sex;

Model 3: adjusted for age, sex, BMI, SBP, DBP, mRS, NIHSS, alcohol intake, tobacco intake, diabetes, hypertension, hyperlipidemia, stroke, CAD, index event, TOAST, lacunes, PV-WMH, and D-WMH.

Model 4: adjusted for age, sex, BMI, SBP, DBP, mRS, NIHSS, alcohol intake, tobacco intake, diabetes, hypertension, hyperlipidemia, stroke, CAD, index event, TOAST.

\*A total of 4663 patients with AIS/TIA were included in the analyses of the association between EPVS and disability because of 122 patients without available mRS score at 3-month follow-up.

\*\*A total of 4522 patients with AIS/TIA were included in the analyses of the association between EPVS and disability because of 263 patients without available mRS score at 1-year follow-up.

HR, hazard ratio; OR, odds ratio; CI, confidence interval, Ref, reference; CVE, combined vascular event; EPVS, enlarged perivascular spaces; BG-EPVS, EPVS in basal ganglia; CSO-EPVS, EPVS in centrum semiovale; BMI, body mass index; SBP, systolic blood pressure; DBP, diastolic blood pressure; CAD: coronary artery disease; NIHSS, National Institutes of Health Stroke Scale score; mRS, modified Rankin scale; TOAST, Trial of Org 10,172 in Acute Stroke Treatment; WMH, white matter hyperintensity; D-WMH, deep-WMH; PV-WMH, periventricular-WMH.

**Figure S1. The flowchart of the selection of patients with SAO**

CNSR-III, the China National Stroke Registry III; TIA, transient ischemic attack; WMH, white matter hyperintensity; EPVS, enlarged perivascular spaces; TOAST, Trial of Org 10,172 in Acute Stroke Treatment; SAO, small arterial occlusion.

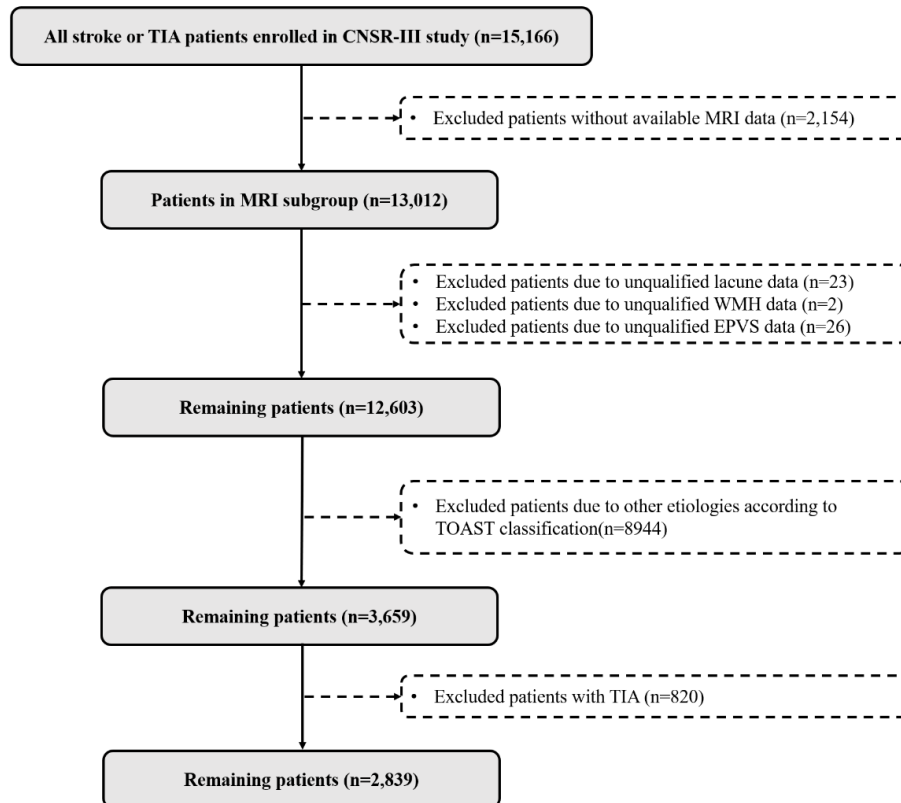

**Figure S2. The flowchart of the selection of patients with CSVD**

CNSR-III, the China National Stroke Registry III; TIA, transient ischemic attack; WMH, white matter hyperintensity; EPVS, enlarged perivascular spaces; CMBs, cerebral microbleeds; CSVD, cerebral small vessel disease.

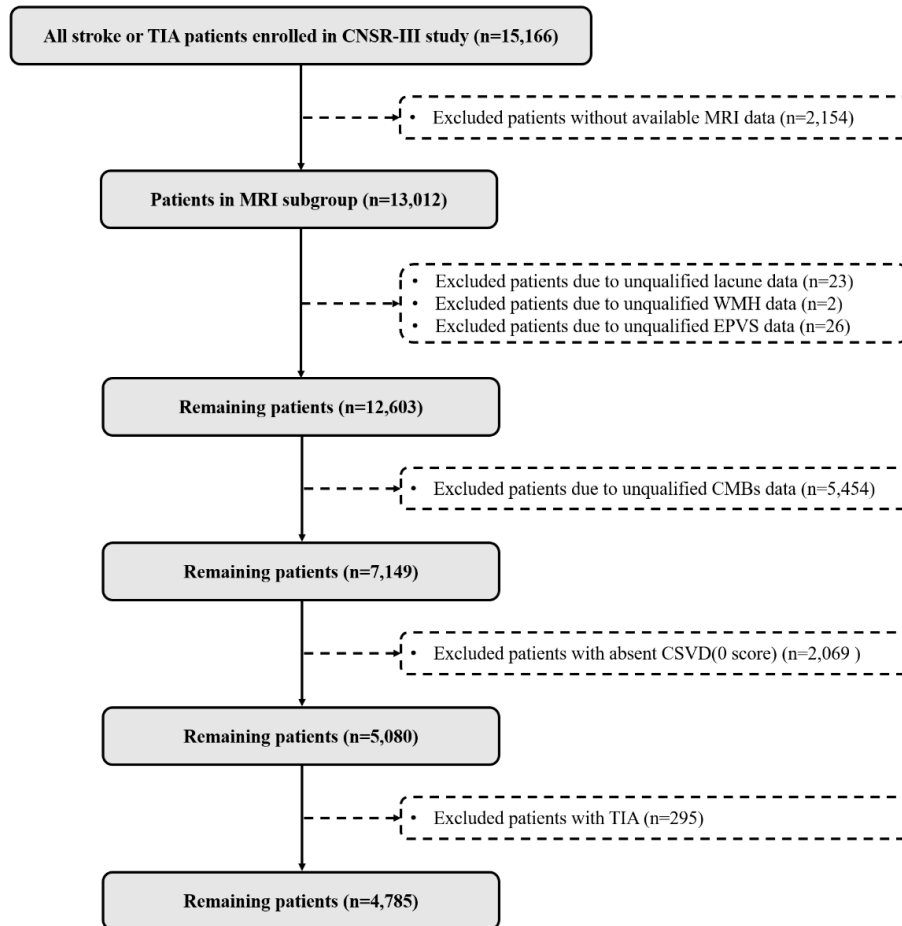

Supplement: svn-2022-002157supp002.pdf [file svn-2022-002157supp002.pdf]
